# Supplementary material for: Efficient photocatalytic degradation of methylene blue using 3D urchin-like TiO2@rGO-hBN architecture
Source: Royal Society of Chemistry journal article supplement (doi:10.1039/d5ra00845j), 2025-01-01
Supplement: d5ra00845j1.pdf [file d5ra00845j1.pdf]

**Efficient photocatalytic degradation of 3D urchin-like TiO<sub>2</sub>@rGO-hBN architecture towards methylene blue**

Nguyen Thi Huyen<sup>a,b</sup>, Tran Ai Suong Suong<sup>c</sup>, Cao Thi Thanh<sup>a</sup>, Nguyen Van Tu<sup>a</sup>, Pham Van Trinh<sup>a</sup>, Tran Van Tan<sup>d</sup>, Le Thi Quynh Xuan<sup>a</sup>, Bui Hung Thang<sup>a</sup>, Tran Van Hau<sup>a</sup>, Do Tuan<sup>a</sup>, Pham Duy Long<sup>a</sup>, Phan Ngoc Minh<sup>b</sup>, Hiroya Abe<sup>c</sup>, and Nguyen Van Chuc<sup>a,b\*</sup>

<sup>a</sup>Institute of Materials Science, Vietnam Academy of Science and Technology, 18 Hoang Quoc Viet, Cau Giay, Hanoi, Vietnam

<sup>b</sup>Graduate University of Science and Technology, Vietnam Academy of Science and Technology, 18 Hoang Quoc Viet, Cau Giay, Hanoi, Vietnam

<sup>c</sup>VNU University of Engineering and Technology, 144 Xuan Thuy, Cau Giay, Hanoi, Vietnam

<sup>d</sup>Faculty of Physics, University of Science, Vietnam National University, Hanoi, 334 Nguyen Trai, Thanh Xuan, Hanoi, Vietnam

<sup>e</sup>Joining and Welding Research Institute, Osaka University, Osaka 5670047, Japan.

\* Corresponding author at: Institute of Materials Science, Vietnam Academy of Science and Technology, 18 Hoang Quoc Viet, Cau Giay, Hanoi, Vietnam.

chucnv@ims.vast.vn (N.V. Chuc)

## Supplementary data

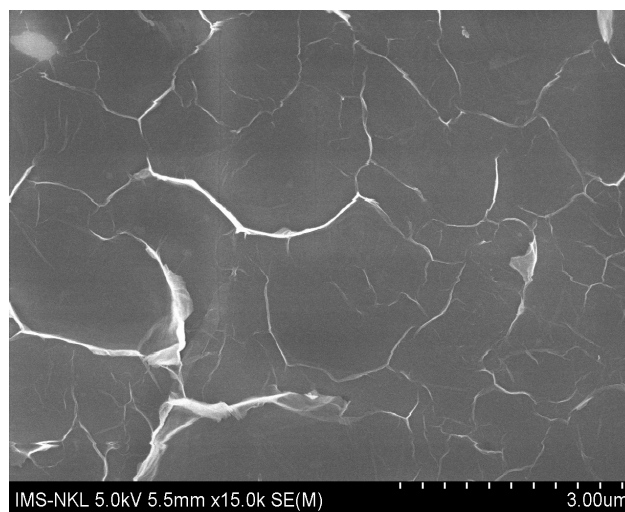

**Fig. S1.** SEM image of GO flakes

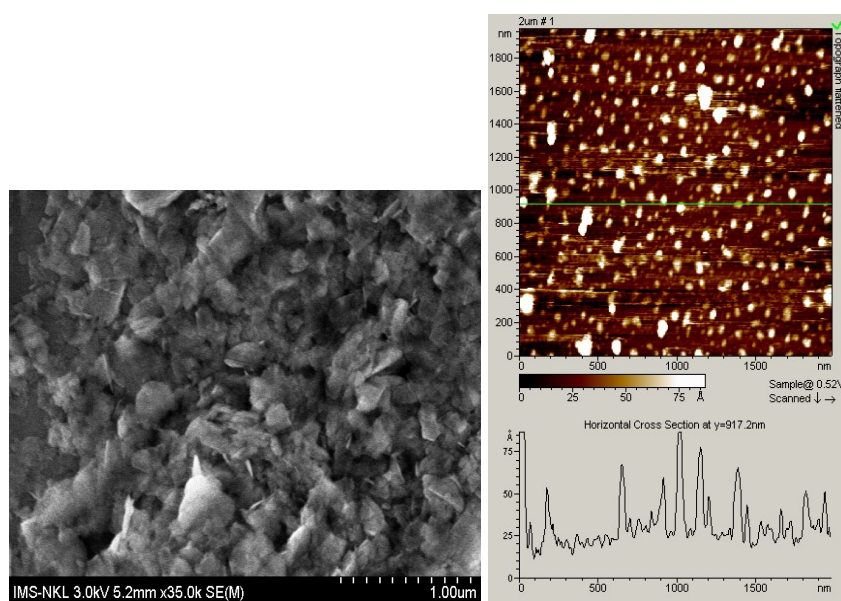

**Fig. S2.** SEM and AFM images of hBN flakes
